1 **Reintroduced native *Populus nigra* in restored floodplain reduces**  
2 **spread of exotic poplar species**

3

4 An Vanden Broeck<sup>a</sup>, Karen Cox<sup>a</sup>, Alexander Van Braeckel<sup>b</sup>, Sabrina Neyrinck<sup>a</sup>, Nico De  
5 Regge<sup>a</sup> & Kris Van Looy<sup>c</sup>

6

7 <sup>a</sup>*Research Institute for Forest and Nature (INBO), Gaverstraat 4, B-9500 Geraardsbergen, Belgium,*  
8 [an.vandenbroeck@inbo.be](mailto:an.vandenbroeck@inbo.be); [karen.cox@inbo.be](mailto:karen.cox@inbo.be); [sabrina.neyrinck@inbo.be](mailto:sabrina.neyrinck@inbo.be); [nico.deregge@inbo.be](mailto:nico.deregge@inbo.be)

9 <sup>b</sup>*Research Institute for Forest and Nature (INBO), Havenlaan 88, B-1000 Brussels, Belgium,*  
10 [alexander.vanbraeckel@inbo.be](mailto:alexander.vanbraeckel@inbo.be)

11 <sup>c</sup>*Public Waste Agency of Flanders (OVAM), Stationsstraat 110, B-2800 Mechelen, Belgium,*  
12 [kris.van.looy@ovam.be](mailto:kris.van.looy@ovam.be)

13

14

15

16

17

18

19

20

21 Corresponding author:

22 An Vanden Broeck; [an.vandenbroeck@inbo.be](mailto:an.vandenbroeck@inbo.be)

23

24 **1. Abstract**

25 Exotic *Populus* taxa pose a threat to the success of riparian forest restoration in floodplain  
26 areas. We evaluated the impact of exotic *Populus* taxa on softwood riparian forest  
27 development along the river Common Meuse after introducing native *Populus nigra* and after  
28 the re-establishment of the natural river dynamics. We sampled 154 poplar seedlings that  
29 spontaneously colonised restored habitat and assessed their taxonomy based on diagnostic  
30 chloroplast and nuclear microsatellite markers. Furthermore, by using a paternity analysis on  
31 72 seedlings resulting from six open pollinated *P. nigra* females, we investigated natural  
32 hybridization between frequently planted cultivated poplars and native *P. nigra*. The majority  
33 of the poplar seedlings from the gravel banks analyzed were identified as *P. nigra*; only 2%  
34 of the sampled seedlings exhibited genes of exotic poplar species. Similarly, the majority of  
35 the seedlings from the open pollinated progenies were identified as *P. nigra*. For three  
36 seedlings (4%), paternity was assigned to a cultivar of *P. x canadensis*. Almost two decades  
37 after reintroducing *P. nigra*, the constitution of the seed and pollen pools changed in the study  
38 area in favour of reproduction of the native species and at the expense of the exotic poplar  
39 species. This study indicates that, although significant gene flow from exotic poplars is  
40 observed in European floodplains, restoration programmes of the native *P. nigra* can  
41 vigorously outcompete the exotic gene flows and strongly reduce the impact of exotic  
42 *Populus* taxa on the softwood riparian forest development.

43

44 **Key-words:** European black poplar; floodplain ecosystem; hybridization; interspecific  
45 mating.; introgression; riparian forests

46

## 47 2. Introduction

48 The restoration and protection of riparian forests is one of the key priorities in biodiversity  
49 conservation and climate change adaptation strategies (e.g. EU Biodiversity Strategy 2030,  
50 EU Floods Directive 2007/60/EC). Riparian forests are biodiversity hotspots and provide a  
51 range of ecosystem services including flood protection, prevention of bank erosion, thermal  
52 regulation by forest canopy cover and water quality protection (e.g. Van Looy et al. 2013).  
53 They are therefore necessary for the ecological functioning of riparian corridors and are  
54 recognized as an important part of the world's natural capital.

55 After decades of ecological degradation caused by human activities, including impoundment  
56 and straightening of rivers, cutting off meanders, drainage of floodplains and deforestation for  
57 agriculture and plantations, several European countries have undertaken actions to restore  
58 natural river dynamics (e.g. Mansourian et al. 2019; Schindler et al. 2016), and the European  
59 Commission proposed a Biodiversity Strategy planning to restore at least 25,000 km of free-  
60 flowing rivers (UE COM Biodiversity Strategy 20/05/2020). Generally, restoration activities  
61 involve dyke relocation, lowering of river banks and floodplains to restore the floodplain  
62 habitat heterogeneity, an essential feature for the regeneration of riparian forests. However,  
63 many restoration projects are poorly documented and written records on the outcome of  
64 restoration projects are generally lacking (Palmer et al. 2007).

65 Revegetation of river margins is a widely applied technique for riparian forest restoration  
66 (Palmer et al. 2007). However, exotic, invasive alien species can significantly undermine  
67 efforts to protect and restore natural floodplain forests (Palmer et al. 2007). Exotic *Populus*  
68 species have been introduced into Europe as well as into the US and Canada for wood  
69 production in riparian landscapes and pose a threat to native *Populus* species. Poplar cultivars  
70 are frequently planted in monoclonal plantations in the vicinity of wild relatives and may  
71 contribute to a large extent to pollen and seed pools, thereby competing with the native  
72 relatives in colonizing restored habitat. Furthermore, intercrossability among *Populus* species  
73 is well-known (Eckenwalder 1984, 1996). In Europe, the native European black poplar  
74 (*Populus nigra* L.) (hereafter referred to as black poplar) is threatened by Euramerican (*P.* ×  
75 *canadensis* Moench.), interamerican (*P.* × *generosa* Henry) hybrid poplar and black poplar  
76 varieties such as the male Lombardy poplar (*Populus nigra* cv. *Italica* Du Roi) (e.g. Arens et  
77 al. 1998; Cagelli and Lefèvre 1995; Chenault et al. 2011; Debeljak et al. 2015; Fossati et al.  
78 2003; Ziegenhagen et al. 2008). Gene flow between cultivated and native poplar species may  
79 result in the reduction of the effective population size, genetic swamping and ultimately the  
80 replacement of populations of the native species (Arnold et al. 2001).

81 As a pioneer species, black poplar plays a key-role in the development of softwood forests in  
82 Europe. In the lower parts of the floodplain, black poplar colonises bare moist soil and river  
83 banks and is highly adapted to water dynamics and sediment movement (Debeljak et al. 2015;  
84 Van Looy 2006). Due to their rapid growth and strong flow resistance, black poplar together  
85 with species of *Salicaceae* (*Salix alba* and *S. viminalis*), contributes to raising bar and island  
86 levels by retaining sand and gravel (Van Looy 2006). Consequently, these softwood forest  
87 species pave the way for the development of the next forest succession stage, the hardwood  
88 forests. Unfortunately, the European black poplar is one of the most threatened tree species in  
89 Europe, mainly because of the loss of its natural alluvial habitats especially sand and gravel  
90 banks that allow for successful reproduction, and because of competition and introgression

91 with exotic poplar species (Fossati et al. 2003; Meyer et al. 2018; Vanden Broeck et al. 2005;  
92 Ziegenhagen et al. 2008).

93 Here, we report on the impact of exotic *Populus* taxa at the initial stages of softwood riparian  
94 forest development of the river Meuse on the Dutch-Belgian border almost two decades after  
95 introducing black poplar and after the re-establishment of the natural river dynamics. To our  
96 knowledge, this is the first study reporting on the effect of re-introducing a native *Populus*  
97 species on gene flow of exotic relative species. The specific objectives of this study are (i) to  
98 study the taxonomy of the poplar seedlings that spontaneously colonised the river banks of the  
99 Common Meuse and (ii) to determine the frequency of natural hybridization events between  
100 male cultivated poplars (including *P. nigra* cv. *Italica*) and the female native black poplars in  
101 the study area. We hereto use a combination of diagnostic chloroplast and nuclear molecular  
102 markers that have been proven useful in identifying the taxonomy of *Populus* seedlings  
103 (Heinze 1998; Imbert and Lefèvre 2003; Ziegenhagen et al. 2008). We compare the results  
104 with a similar study performed in 1999 -2001 at the same site and before the restoration  
105 actions took place (Vanden Broeck et al. 2004). Finally, we discuss the implications for the  
106 restoration and conservation of softwood riparian forests with black poplar along European  
107 rivers.

### 108 **3. Material & Methods**

#### 109 3.1 Study site

110 The area of interest was the riverside of the Common Meuse, a free-flowing middle course of  
111 the river Meuse, which forms for 45 km the border between Belgium and the Netherlands  
112 (Figure 1). Shipping and flow regulation are absent on this river stretch. The Common Meuse  
113 is a rain-fed river with a gravel-bed, a strong longitudinal gradient (0.45 m/km) and a wide  
114 alluvial plain (Van Looy et al. 2005). The Common Meuse valley consists of a gravel  
115 underground with a loamy alluvial cover. Traditionally, meadows were created in the  
116 floodplains. Cultivated poplars are frequently planted at the study site (Vanden Broeck et al.  
117 2004). Large parts of the alluvial plain have been excavated for gravel mining, leaving large  
118 gravel pits or lowered floodplain zones (Van Looy et al. 2005). The extreme high water levels  
119 and floodings of 1993 and 1995, were the start of the development of a large scale,  
120 transboundary river restoration project for the Common Meuse; called 'Living River  
121 Strategy'. The concept of this plan was to restore hydrodynamics and morphodynamics and  
122 related ecological characteristics in the primary river channel (Van Looy et al. 2006). The  
123 restoration activities were performed during the period 2005-2008 and included removal of  
124 dykes, excavation of the floodplain, channel widening and bank lowering. The restoration of  
125 the morphological activity (erosion / sedimentation rates) of the river reach resulted in a  
126 strong revitalisation of the elevation of bars and islands, creating suitable habitat for seedling  
127 recruitment and the restoration of softwood riparian forest with willow, poplar and ash  
128 communities (Van Braeckel 2007; Van Looy et al. 2008).

#### 129 3.2 Reinforcement of the Black poplar population

130 A reintroduction project of *P. nigra* was performed in the period 2002-2005. The aim was to  
131 create seed sources and thereby to promote the colonisation of native *P. nigra* in newly  
132 restored habitat. This was the follow-up of a study performed in 1999-2000 on the restoration  
133 potential and constraints of the development on softwood riparian forests along the Common

134 Meuse (Vanden Broeck and Jochems 2002; Vanden Broeck et al. 2004). This former study  
135 emphasized the need for re-planting native *P. nigra* since natural populations were almost  
136 gone extinct in the study area and > 150 km further upstream in Northeast France (Vanden  
137 Broeck 2004). A few isolated relict trees of *P. nigra* in the study area suggested the presence  
138 of natural populations in the past. In contrast to the native poplar species, plantations of exotic  
139 poplars of *P. x canadensis* and *P. nigra* cv. *Italica* were common within the study area  
140 (Vanden Broeck et al. 2004).

141 *P. nigra* was successfully planted on two locations; location Groeskens (Dilsen-Stokkem,  
142 51°01'01N, 05°46'02E) and location Negenoord (Dilsen-Stokkem, 51°01'36 N, 05°46'16E)  
143 on 0.77 ha and 2 ha, respectively. In total, 275 two-year old bare-root *P. nigra* trees were  
144 planted, with plant distances of 9 m x 9 m and 4 m x 8 m, in Groeskens and Negenoord,  
145 respectively. The distance from the centre of the plantings to the river bank was about 140 m  
146 for Groeskens and 5 m for Negenoord. The selection of the plant locations was based on the  
147 close connection to the river and on locations indicated close to potential sites for riparian  
148 forest development by a habitat model developed for the Common Meuse by Van Looy et al.  
149 (2005). The plant material originated from the national *P. nigra* gene bank collections at the  
150 Research Institute for Nature and Forest (INBO, Belgium; 57 genets) and at Alterra (The  
151 Netherlands; 21 genets) supplemented with 23 genets from a natural population located along  
152 the river Rhine in Germany (location Kühkopf, FA Groß-Gerau, 48° 48' 56,62 N, 8° 7' 38,60  
153 O) and about 90 seedlings of controlled crosses performed at INBO with genotypes of *P.*  
154 *nigra* from the gene bank collection. All the plant material, was identified as pure *P. nigra* by  
155 molecular markers (Smulders et al. 2008b; Storme et al. 2001). Trees started to produce  
156 pollen and seeds, ten to fifteen years after planting.

### 157 3.3 Plant material sampled

#### 158 3.3.1 Poplar seedlings from the gravel banks

159 Poplar seedlings that naturally colonized the gravel banks of the natural floodplains of the  
160 river Common Meuse were sampled on the banks along a 28 km-river section. We collected  
161 leaf samples of 52 and 102 poplar seedlings in late summer of 2018 and 2019, respectively.  
162 The geographical location of each sampled seedling was recorded. In 2018, poplar seedlings  
163 were sampled randomly within the 28 km-section. In 2019, a more systematic survey was  
164 performed within part of the same route, of about 9 km along the riverside; each gravel bank  
165 was inspected by walking along the river. In case rejuvenation was present on a site, one to  
166 twenty-tree seedlings were sampled across the rejuvenation site (mean: 1.6), depending on the  
167 area of the colonized location. Only individuals that most likely originated from seed  
168 germination and not from vegetative reproduction by root suckers were sampled. One young  
169 leaf was collected from each seedling and dried in silica gel for DNA-analyses. The  
170 estimated height of the majority of the sampled individuals was between 10 and 50 cm,  
171 corresponding with the seedling or establishing stage (2-3 years) of riparian forest  
172 development (Van Looy et al. 2005). The location along the river of the seedlings sampled is  
173 given in Figure 1. The poplar seedlings were visually identified by their leaf morphology. One  
174 young leaf was collected from each seedling and dried in silica gel for DNA-analyses.

#### 175 3.3.2 Open pollinated progenies of *P. nigra*

176 *Populus* species are predominantly dioecious and thus obligatory outcrossers. Seeds of adult  
177 open pollinated (OP) European black poplar females located in the study area were collected

178 in two successive years. In June 2018, seeds were collected at the location Groeskens from the  
179 lower branches of the crown of six European black poplars. In June 2019, seeds were  
180 collected on in total nine European black poplar females; six trees from location Groeskens  
181 and three trees from location Negenoord. Seeds were collected from mature catkins, sown in  
182 trays in the greenhouse (50% white peat / 50% black peat) within one week after collection.  
183 For the seeds collected in 2019, germination percentage was determined. One young leaf  
184 was collected from each seedling and dried in silica gel for DNA-analyses. The number of  
185 seeds collected per open-pollinated *P. nigra* female is given in Table 1.

### 186 3.3.3 Reference material

187 In Europe, poplar species frequently used in breeding programmes in order to produce hybrids  
188 are the European *P. nigra*, the North American cottonwoods *P. deltoides* W. Bartram ex  
189 Marshall. and *P. trichocarpa* Torr. & A. Gray., and to a lower extent *P. maximowiczii* Henry  
190 native to northeast Asia. The unit of cultivation and breeding in poplars is a clone, and  
191 individual cultivars are normally represented by a single clone. We included 76 reference  
192 samples with known taxonomic identity of frequently used pure poplar species and hybrids as  
193 positive controls for verifying the species-specificity of the molecular markers. Furthermore,  
194 reference samples of *P. nigra* and of frequently planted commercial male poplar cultivars  
195 were included as potential fathers in the paternity-analyses. Reference material was obtained  
196 from the clone collection of INBO located in Geraardsbergen, Belgium. The following taxa  
197 were included: section Aigeiros with *P. deltoides* (4 samples), *P. nigra* (18 samples), *P. x*  
198 *canadensis* (*P. deltoides* x *P. nigra*) (37 samples), section Tacamahaca with *P. trichocarpa* (4  
199 samples), *P. trichocarpa* x *P. maximowiczii* (3 samples) and the intersectional hybrid; *P. x*  
200 *generosa* (*P. trichocarpa* x *P. deltoides*) (10 samples). The list of reference material is given  
201 in Supplementary Table S1.

## 202 3.4 Identification of hybrids

### 203 3.4.1 DNA extraction

204 Total genomic DNA was extracted from the sampled leaves with the QuickPick Plant DNA  
205 kit (Bio-Nobile) using the MagRo 96-M robotic workstation (Bio-Nobile). For a subset of the  
206 samples (10%), the integrity of the DNA was assessed on 1% agarose gels. DNA  
207 quantification was performed with the Quant-iT PicoGreen dsDNA Assay Kit (Thermo Fisher  
208 Scientific, Massachusetts, USA) using a Synergy HT plate reader (BioTek, Vermont, USA).

### 209 3.4.2 Chloroplast DNA marker

210 The chloroplast DNA (cpDNA) locus *trnDT* shows interspecific variation between *P. nigra*,  
211 *P. deltoides* and *P. trichocarpa* (Heinze 1998; Meyer et al. 2018). Because of its maternal  
212 inheritance and the female contribution of *P. deltoides* to the poplar clones frequently planted  
213 in Europe, this marker offers a tool to identify the maternal contribution of *P. deltoides* / *P. x*  
214 *canadensis*, *P. nigra* and *P. trichocarpa* in the poplar seedlings collected from the gravel  
215 banks (e.g. Csencsics and Holderegger 2016; Heinze 1997; Ziegenhagen et al. 2008). We used  
216 the conserved PCR primer pair *trnD/trnT* (Demesure et al. 1995) in combination with the  
217 restriction enzyme *HinfI*. Genomic DNA (~20 – 50 ng) was used as template in the PCR  
218 reactions. The PCR reaction conditions and restriction reactions were as described by Heinze  
219 (1998). Reaction products and a 100 bp ladder were analysed by agarose gel electrophoresis.



### 220 3.4.3 Microsatellite analysis

221 We selected nine microsatellite loci that were found useful in former studies for the analysis  
222 of natural hybridization events between cultivated poplars and their wild relative *P. nigra*  
223 (Liesebach et al. 2010; Smulders et al. 2001; van der Schoot et al. 2000), and that were found  
224 reliable for clonal fingerprinting in several species and hybrids of the sections Aigeiros and  
225 Tacamahaca (Dayanandan et al. 1998; Liesebach et al. 2010; Rahman et al. 2000). All  
226 markers are unlinked (Cervera et al. 2001; Gaudet et al. 2008). According to former studies,  
227 five loci produce species-diagnostic alleles for *P. deltoides* and/or *P. trichocarpa*: PMGC14  
228 (Fossati et al. 2003; Liesebach et al. 2010), PMGC456 (Liesebach et al. 2010), PMGC2163  
229 (Liesebach et al. 2010), WPMS09 (Fossati et al. 2003; Liesebach et al. 2010) and WPMS20  
230 (Liesebach et al. 2010). SSR analysis was performed on the OP progenies, the seedlings from  
231 the gravel banks and the reference samples as described by Smulders et al. (2001) and van der  
232 Schoot et al. (2000). Ten samples were replicated twice starting from a second DNA-extract  
233 to calculate the genotyping error rate. PCR products were run on an ABI3500 Genetic  
234 Analyzer (Applied Biosystems) and genotypes were analysed with the GeneMapper v.6.0  
235 software package. Samples with fewer than 8 scored loci were discarded from the data  
236 analysis. Details on the microsatellite loci are given in Table 2.

### 237 3.4.4 Data analysis

238 The maternal origin of the poplar seedlings sampled on the gravel banks was investigated  
239 using the cpDNA locus *trnDT*. The poplar seedlings from the gravel banks and the OP  
240 progenies were analysed for the presence of diagnostic alleles of *P. deltoides* and *P.*  
241 *trichocarpa* on the five diagnostic SSR loci. A diagnostic allele for *P. deltoides* in *P. nigra*  
242 maternal offspring indicates a backcrossed individual with *P. x canadensis* paternity as a  
243 result of a natural hybridization event between a cultivar of *P. x canadensis* and a native *P.*  
244 *nigra*.

245 We also performed a paternity analysis on the OP progenies using the microsatellite data to  
246 determine pollination events of frequently planted male poplar cultivars included in the  
247 reference samples. We used a likelihood-based approach implemented in the program  
248 CERVUS 3.0.7 (Marshall et al. 1998) with the reference samples described above (48;  
249 females excluded) as potential fathers, given a known mother. The paternity assignment  
250 technique used by CERVUS requires the knowledge of the total number of candidate males in  
251 the population and the proportion of the candidate males sampled for the simulation-based  
252 approach to assess the confidence of the assignments. For the simulation, we used the LOD  
253 distribution and we assumed 50 candidate fathers and a proportion of 0.3 candidate fathers  
254 sampled, allowing an error rate of 0.01 and allowing a mismatch between parent and offspring  
255 on one locus taking into account somatic mutations and null alleles.

## 256 4. Results

### 257 4.1 Diagnostic microsatellite alleles

258 The percentage missing data for the total microsatellite data was 0.07%. Replicated samples  
259 resulted in identical multilocus genotypes. For the seedlings sampled from the gravel banks,  
260 two multilocus genotypes were shared by two and three sampled seedlings, respectively. It is  
261 possible that some individuals were sampled twice, in 2018 and 2019. Only one genotype  
262 among these replicates was kept in the final dataset. The microsatellite data confirm the

263 presence of species-diagnostic alleles reported in former studies by Liesebach et al. (2010)  
264 and Fossati et al. (2003) for PMGC14, PMGC456, PMGC2163 and WPMS09 but not for  
265 WPMS20. For PMGC14, the alleles 192 and 198 were typical for all reference clones of *P.*  
266 *deltoides* and for *P. x canadensis*, and the allele 200 was typical for all reference clones of *P.*  
267 *trichocarpa*. For WPMS09, allele 232 was present in the reference clones of *P. deltoides* and  
268 of *P. x canadensis*, except for 16 *P. x canadensis* reference clones that were homozygote for  
269 this locus. This can be explained by their genetic origin (i.e. F2 or back-cross clones) or by  
270 the presence of a null allele. For WPMS20, the characteristic allele for *P. deltoides* (allele  
271 200) also frequently occurred in *P. nigra*, which was also reported by Liesebach et al. (2010).  
272 Furthermore, species-specific alleles were present at locus PMGC2163 (*P. deltoides*: allele  
273 185, *P. trichocarpa*: alleles 199, 200) and locus PMGC456 (*P. deltoides*: allele 82, *P.*  
274 *trichocarpa*: alleles 93, 109, *P. nigra*: allele 75).

#### 275 4.2 Poplar seedlings from the gravel banks

276 From the 154 seedlings sampled on the gravel banks, 135 showed a clear banding pattern for  
277 the cpDNA locus *trnDT*. From the latter, 133 (98.5%) poplar seedlings showed a *P. nigra*-  
278 specific *trnDT* marker-fragment (~880 bp). These seedlings also showed a *P. nigra*-like leaf  
279 morphology. The typical gene variant of *P. nigra* observed on the maternal inherited  
280 diagnostic cpDNA locus *trnDT* indicated that they originated from a female *P. nigra*.  
281 Furthermore, two (1.5%) seedlings showed a *P. trichocarpa*-specific cpDNA fragment  
282 (~1000bp). These two samples with a *P. trichocarpa*-like leave morphology were collected on  
283 an upstream distance of 6 km from the nearest *P. nigra*. No seedlings were detected with a  
284 fragment length specific of *P. deltoides* (~1135bp). The results of the diagnostic microsatellite  
285 alleles confirmed the presence of species-specific *P. trichocarpa* alleles at loci PMGC147,  
286 PMGC2163 and PMGC456 for the two seedlings with a *P. trichocarpa*-specific *trnDT*  
287 marker-fragment. For one of these two seedlings, species-specific alleles of *P. trichocarpa*  
288 were homozygous, suggesting that this seedling could have originated from two *P.*  
289 *trichocarpa* or *P. x generosa* cultivars. Furthermore, two more seedlings sampled in the field  
290 showed species-specific alleles of *P. deltoides* in heterozygous state at three and four  
291 diagnostic loci, respectively. Given their *P. nigra*-specific *trnDT* marker-fragment, they likely  
292 originated from a *P. nigra* x *P. x canadensis* back-cross. Summarised, four (2%) out of the  
293 154 young poplars analysed from the gravel banks exhibited genes of exotic, cultivated poplar  
294 species.

#### 295 4.3 Identification of hybrids in open pollinated progenies

296 Viable seedlings were obtained from six and five black poplar trees in 2018 and 2019,  
297 respectively. The mother trees presented only two different genets. The mean germination  
298 percentage for the 1492 seeds sown in 2019 was low (2.9% ; range of 0% to 6.6%). In total,  
299 we obtained 74 viable seedlings of which 72 were successfully genotyped (Table 1). We  
300 detected no alleles species-specific to *P. deltoides* or *P. trichocarpa* in the 72 analysed  
301 seedlings from the OP *P. nigra* progenies, suggesting the absence of backcrossed individuals  
302 with *P. x canadensis* or *P. x generosa* as potential fathers.

303 However, the paternity analysis revealed *P. x canadensis* a highly likely father for three  
304 seedlings from the OP progeny from seed harvested in 2018 on one mother tree (ID 2.16) at  
305 location Groeskens. Paternity was determined with 95% confidence for 27 (38%) seedlings.



306 When using a relaxed confidence level of 80%, paternity was assigned to 48 (67%) seedlings.  
307 For 24 (33%) seedlings, the paternity remained unresolved. For one seedling paternity was  
308 assigned to *P. x canadensis* cv. Serotina de Champagne using a relaxed confidence level and  
309 with no paternity-offspring mismatches. Also for a second seedling from the same mother  
310 tree, *P. x canadensis* cv. Serotina de Champagne was the most likely father with a mismatch  
311 for only one locus (PMGC14), possibly due to a somatic mutation. A third seedling from the  
312 same OP progeny showed *P. x canadensis* cv. Serotina as the most likely father, although  
313 mismatch was observed at two loci (PMGC14, PTR07). The other determined paternities  
314 were assigned to trees of *P. nigra*. No offspring was assigned to the male cultivar *P. nigra* cv.  
315 Italica, nor to the nearby planted male *P. x canadensis* cv. Robusta or to the reference  
316 cultivars of *P. x generosa*.

317

## 318 5. Discussion

319 The results of this study illustrate the importance of in situ reinforcement of black poplar to  
320 reduce the potential impact of exotic poplar cultivars in European floodplains in case natural  
321 river dynamic processes are restored and adult black poplar trees are scarce. The numbers of  
322 young poplar seedlings that colonized the gravel banks of the river Meuse exceeded 100 fold  
323 the initial number of seedlings observed by Vanden Broeck et al. (2004). Additionally the  
324 number of seeds and seedlings with exotic poplar genes were diminished to a very low  
325 proportion compared to the situation before the restoration.

### 326 5.1 Limited interspecific matings

327 The majority (150, 98%) of the poplar seedlings from the gravel banks analyzed were  
328 identified as 'pure' *P. nigra* seedlings; the typical gene variant of *P. nigra* observed in the  
329 maternal inherited diagnostic cpDNA locus *trnDT* indicated that they originated from a  
330 female *P. nigra*. They could not originate from cultivated first-generation (F1) *P. x*  
331 *canadensis* hybrids, as cultivated clones of *P. x canadensis* are the result from artificial  
332 crosses between a female *P. deltoides* and a male *P. nigra*, thus carrying the *P. deltoides*  
333 haplotype (Heinze 1998; Zsuffa 1974). Furthermore, the absence of microsatellite alleles of *P.*  
334 *deltoides* or *P. trichocarpa* suggests that they were fathered by *P. nigra*. Only a small number  
335 (four; 2%) of young poplars analyzed from the gravel banks exhibited genes of exotic,  
336 cultivated poplars. Of the latter, two seedlings showed *P. trichocarpa* genes while the other  
337 two resulted from a first-generation back-cross (BC1) of a male *P. x canadensis* and a female  
338 *P. nigra*. No gene variants of exotic poplar species were detected in the OP progenies. This  
339 was largely confirmed by the paternity analyses, except for three seedlings (4%) of which two  
340 were likely fathered by *P. x canadensis* cv. Serotina de Champagne and one seedling by *P. x*  
341 *canadensis* cv. Serotina. It must be noted that these two cultivars are clearly different and not  
342 related, although their names suggest otherwise. They show different alleles at seven out of  
343 the nine microsatellite loci genotyped and also show differences in leaf morphology as was  
344 noted by Broekhuizen (1960). No paternity was assigned to the male cultivar *P. nigra* cv.  
345 Italica (Lombardy poplar), one of the most planted poplar cultivars. In Belgium, the  
346 Lombardy poplar generally flowers before the majority of the native black poplars (Vanden  
347 Broeck et al. 2003a), which may not be the case in more Southern regions (Chenault et al.  
348 2011). Absence of flowering synchrony may explain why no paternity was assigned to this  
349 cultivar or to the nearby planted male *P. x canadensis* cv. Robusta in this study.

350 To our knowledge, this is the first study combining diagnostic chloroplast and nuclear  
351 molecular markers with a paternity analysis to detect interspecific hybridization events  
352 between native black poplar and poplar cultivars. The probability to detect gene variants of *P.*  
353 *deltoides* using four diagnostic nuclear microsatellite loci and according to Mendelian rules in  
354 first-backcross generations (BC1) is 93.75%, but decreases to 68.36% for second back-cross  
355 generations (BC2) (see Bialozyt et al. 2012). This could explain why gene variants of *P.*  
356 *deltoides* remained undetected in three seedlings from the OP progenies to which a cultivar of  
357 *P. x canadensis* was assigned as the most likely father. In this study, the paternity analysis  
358 increased the reliability to identify further generation back-cross events in the OP progenies.  
359 However, the power of a paternity analysis depends on the potential male parents included in  
360 the analysis and the assumptions made on the proportion of potential fathers sampled. It is

361 possible that some second back-cross events remained undetected because of these sampling  
362 limitations.

### 363 5.2 Pollen and seed pools affecting exotic gene flow

364 The contrast in the number of interspecific mating events before and after the river and  
365 vegetation restoration activities is remarkable. In 1999 - 2001, the majority of the seedlings  
366 sampled on the gravel banks (27/29; 93%) showed a *P. trichocarpa* fragment at the cpDNA  
367 locus *trnDT* and/or species-specific alleles of *P. deltoides* (Vanden Broeck et al. 2004). In  
368 contrast to this study, gene variants of exotic poplar species were also detected in the majority  
369 of the seedlings (32/34; 94%) of the OP progenies of an isolated female *P. nigra* in the study  
370 area in 1999 - 2001 (Vanden Broeck et al. 2004). At that time, *P. nigra* was extremely rare in  
371 the study area as a result of habitat reduction and fragmentation; the native species was only  
372 represented by a few old trees, in contrast with the widely planted poplar cultivars (Vanden  
373 Broeck et al. 2004). The strong decrease in population size combined with the habitat  
374 fragmentation of the native *P. nigra* increased the opportunities for contact with cultivated  
375 poplar clones and provided at that time excellent opportunities for the production of hybrid  
376 seeds and seedlings. Poplars are prolific seed producers; one tree can produce over 50 million  
377 of seeds in a single season (Oecd 2000). Nevertheless, poplar hybrids are generally  
378 characterized by reduced fertility relative to parental species, with significant lower pollen  
379 production and seed viability in F1-hybrids (Stettler et al. 1996). It is therefore likely that the  
380 seed production and seed viability of *P. nigra* outperformed those of the cultivated poplars.  
381 Also, pollen load composition and size could have been an important process in limiting the  
382 production of hybrid progeny. The low frequencies of interspecific mating relative to  
383 intraspecific mating using a pollen mixture of different taxa in controlled crosses suggest a  
384 greater competitive ability for conspecific pollen (Benetka et al. 2002; Gaget et al. 1989;  
385 Rajora 1989; Vanden Broeck et al. 2003b). As a result, the relative fertilization success of a  
386 pollen tree depends upon the taxon constitution of the pollen mix and thus on the number and  
387 taxon of the producing pollen trees in the study area.

388 In this study, the few seedlings showing exotic poplar genes were located at distances of > 1  
389 km from the nearest reintroduction sites of black poplar. This indicates that hybrid poplars  
390 still reproduce in the study area, in particular on sites located further away from the  
391 reforestation sites of black poplar. Establishing more seed sources of black poplar over the  
392 river stretch could further reduce hybrid reproductive success along the Common Meuse.  
393 Although conspecific siring of female *P. x canadensis* is enhanced by the presence of pollen  
394 of black poplar (Vanden Broeck et al. 2012), the higher local density of male and female  
395 black poplars appears to guarantee the establishment of mainly pure black poplar seedlings  
396 nearby the parental stands. Considering the possibility of long distance gene flow (Imbert and  
397 Lefèvre 2003), investigations of interspecific mating events would ideally cover the whole  
398 river stretch where natural habitat is restored.

### 399 5.3 Conservation implications

400 The results of this study illustrate the importance of in situ reinforcement of black poplar  
401 populations to reduce the potential impact of exotic poplar cultivars along European  
402 floodplains where natural river dynamic processes are restored and adult black poplar trees  
403 are scarce. The potential risks for gene introgression from exotic poplars into black poplar is

404 indeed highly variable between geographic locations and river sites, largely depending on  
405 habitat fragmentation, flowering synchrony and the composition of the pollen and seed pool at  
406 the specific site. While interspecific gene flow seems to be absent in large natural populations  
407 of black poplar, like in France along the rivers Loire, Garonne and Drôme (Imbert and  
408 Lefèvre 2003), significant gene flow from exotic poplars in riparian floodplains is reported  
409 along the rivers Rhine and the Elbe in Germany (Meyer et al. 2018; Ziegenhagen et al. 2008),  
410 the Morava River in the Czech Republic {Pospiskova, 2006 #832}, the Ticino river in Italy  
411 (Fossati et al. 2003), the Rhine river in The Netherlands (Arens et al. 1998; Smulders et al.  
412 2008a) and the rivers Thur and Reuss in Switzerland (Csencsics and Holderegger 2016). This  
413 case study along the Common Meuse, demonstrates that reintroduction and reinforcement of  
414 native black poplar populations can reverse the situation from high to low risk of  
415 introgression with cultivated poplars on a relatively short time scale. By changing the  
416 composition of the seed and pollen pool, black poplar nowadays has a competitive advantage  
417 compared to the exotic poplars in colonizing the restored river banks along the Common  
418 Meuse.

419 Hundreds of young black poplar seedlings colonized the gravel banks. With an estimated age  
420 for the majority of the seedlings of two to three years old, they survived the germination stage  
421 and currently present the establishment stage of softwood forest development with the  
422 development of dense thickets (Van Looy 2006). The survival of poplar seedlings depends on  
423 the combination of many factors broadly related to the availability of water and oxygen  
424 (Hughes et al. 2001). As a result of the critical conditions required by seedlings, successful  
425 establishment only occurs in some years, and within well-defined elevational bands (Hughes  
426 et al. 2001). Furthermore, established seedlings at lower river levels are frequently subject to  
427 later removal or damage by drought, flooding, sediment burial or mechanical disturbance  
428 (Hughes et al. 2001; Jacquemyn et al. 2006). Seedling survival should therefore be monitored  
429 over larger time scales to evaluate the success of this restoration project and to predict riparian  
430 forest development along the river Common Meuse. Management and conservation plans  
431 should include further monitoring of the seedling colonization and survival, the effective  
432 population size and the introgression of foreign genes in black poplar across multiple  
433 generations. Also, the vegetative spread of cultivated hybrids, which was not the focus of this  
434 study, should be taken into consideration in predicting the development of riparian forest  
435 ecosystems. The data can then be used for the construction of habitat models to identify  
436 occupied or potential habitat and to predict riparian forest development in the restored  
437 floodplain area (Debeljak et al. 2015; Van Looy et al. 2005).

## 438 **6. Conclusions**

439 Almost two decades after the reintroduction of black poplar along the river Common Meuse,  
440 the constitution of the seed and pollen pool changed in the study area thereby benefitting the  
441 reproduction of the native species at the expense of the reproduction capacity of the exotic  
442 poplar species. Increasing the density of male and female black poplars appears to guarantee  
443 the establishment of mainly pure black poplar seedlings nearby the parental stands.  
444 Nevertheless, exotic poplar species still reproduce at larger distances from the revegetation  
445 sites and colonize restored habitat thereby competing for resources with the native species.  
446 Therefore, increasing the number of native black poplar seed sources along the river stretch  
447 will help the native black poplar to maintain its competitive advantage over the exotic poplars

448 and will contribute considerably to the success of riparian forest development along the  
449 Common Meuse.

450 **7. Author statements**

451 AVdB, KVL: conceptualization; AVdB: methodology, formal analysis, writing - original  
452 draft; KC, AVB, KVL: writing - review & editing; SN, NDR: methodology, resources. All  
453 authors have read and approved the final version.

454 **8. Declaration of competing interest**

455 The authors declare that they have no potential conflicts of interest.

456



457 **9. Acknowledgements**

458 The authors gratefully acknowledge the river managers Herman Gielen and Joke Verstraelen  
459 for their enthusiasm and support. The authors also thank Wim De Clercq and Jemp Peeters for  
460 the field assistance, and Marc Schouppe for the technical assistance in the greenhouse.

461 **10. Role of the funding source**

462 De Vlaamse Waterweg nv provided financial support for the conduct of the research. The  
463 funding source was not involved in study design, also not in the collection, analysis and  
464 interpretation of data, or in the decision to submit the article for publication.

465 **11. Data profile**

466 Data will be made available after acceptance of the manuscript for publication by the data  
467 repository DRYAD.

468

469 **12. References**

- 470 Arens, P., Coops, H., Jansen, J., Vosman, B., 1998. Molecular genetic analysis of black poplar  
471 (*Populus nigra* L.) along Dutch rivers. *Molecular Ecology* 7, 11-18.  
472
- 473 Arnold, M.L., Kentner, E.K., Johnston, J.A., Cornman, S., Bouck, A.C., 2001. Natural  
474 hybridisation and fitness. *Taxon* 50, 93-104.  
475
- 476 Benetka, V., Vacková, K., Bartáková, I., Popísková, M., Rasl, M., 2002. Introgression in  
477 black poplar (*Populus nigra* L. ssp. *P. nigra*) and its transmission. *Journal of Forest Science*  
478 48, 115-120.  
479
- 480 Bialozyt, R., Rathmacher, G., Niggemann, M., Ziegenhagen, B., 2012. Reconstructing explicit  
481 mating schemes in poplar hybrids - a case study in the *Populus nigra* L. - *Populus x*  
482 *canadensis* Moench complex. *Silvae genetica* 61, 157-167.  
483
- 484 Broekhuizen, j.T.M., 1960. Herkomst en nomenclatuur van enige populierencultivars.  
485 *Nederlands Bosbouw Tijdschrift* 32, 153-159.  
486
- 487 Cagelli, L., Lefèvre, F., 1995. The conservation of *Populus nigra* L. and gene flow with  
488 cultivated poplars in Europe. *Forest genetics* 2, 135-144.  
489
- 490 Cervera, M.-T., Storme, V., Ivens, B., Gusmao, J., Liu Ben, H., Hostyn, V., Van Slycken, J.,  
491 Van Montagu, M., Boerjan, W., 2001. Dense genetic linkage maps of three *Populus* species  
492 (*Populus deltoides*, *P. nigra* and *P. trichocarpa*) based on AFLP and microsatellite markers.  
493 *Genetics* 158, 787-809.  
494
- 495 Chenault, N., Arnaud-Haond, S., Juteau, M., Valade, R., Almeida, J.-L., Villar, M., Bastien,  
496 C., Dowkiw, A., 2011. SSR-based analysis of clonality, spatial genetic structure and  
497 introgression from the Lombardy poplar into a natural population of *Populus nigra* L. along  
498 the Loire River. *Tree Genetics & Genomes* 7, 1249-1262.  
499
- 500 Csencsics, D., Holderegger, R., 2016. Origin of natural regeneration of black poplar (*Populus*  
501 *nigra* L.) and co-occurrence with hybrid poplar offspring. *Flora* 222, 20-26.  
502
- 503 Dayanandan, S., Rajora, O.P., Bawa, K.S., 1998. Isolation and characterization of  
504 microsatellites in trembling aspen (*Populus tremuloides*). *Theoretical and Applied Genetics*  
505 96, 950-956.  
506
- 507 Debeljak, M., Ficko, A., Brus, R., 2015. The use of habitat and dispersal models in protecting  
508 European black poplar (*Populus nigra* L.) from genetic introgression in Slovenia. *Biological*  
509 *Conservation* 184, 310-319.  
510
- 511 Demesure, B., Sodzi, N., Petit, R.J., 1995. A set of universal primers for amplification of  
512 polymorphic noncoding regions of mitochondrial and chloroplast DNA in Plants. *Molecular*  
513 *Ecology* 4, 129-131.  
514
- 515 Eckenwalder, J.E., 1984. Natural intersectional hybridization between North American  
516 species of

- 517 *Populus* (Salicaceae) in sections Aigeiros and Tacamahaca. III. Paleobotany and evolution.  
518 Canadian Journal of Botany 62, 336-342.  
519
- 520 Eckenwalder, J.E., 1996. Systematics and evolution of *Populus* In: Biology of *Populus*, eds.;  
521 R.F. Stettler, H.D. Bradshaw, P.E. Heilman Jr, T.M. Hinckley, pp. 7-32. NRC Research Press.  
522 National Research Council of Canada, Ottawa, ON, Canada.  
523 Fossati, T., Grassi, F., Sala, F., Castiglione, S., 2003. Molecular analysis of natural  
524 populations of *Populus nigra* L. intermingled with cultivated hybrids. Molecular Ecology 12,  
525 2033-2043.  
526
- 527 Gaget, M., Villar, M., Dumas, C., 1989. The mentor pollen phenomenon in poplars: a new  
528 concept. Theoretical and Applied Genetics 78, 129-135.  
529
- 530 Gaudet, M., Jorge, V., Paolucci, I., Beritognolo, I., Mugnozza, G.S., Sabatti, M., 2008.  
531 Genetic linkage maps of *Populus nigra* L. including AFLPs, SSRs, SNPs, and sex trait. Tree  
532 Genetics & Genomes 4, 25-36.  
533
- 534 Heinze, B., 1997. A PCR Marker for a *Populus deltoides* allele and its use in studying  
535 introgression with native European *Populus nigra* Belgian Journal of Botany 129, 123-130.  
536
- 537 Heinze, B., 1998. PCR-Based chloroplast DNA assays for the identification of native *Populus*  
538 *nigra* and introduced poplar hybrids in Europe. Forest genetics 5, 31-38.  
539
- 540 Hughes, F.M.R., Adams, W.M., Muller, E., Nilsson, C., Richards, K.S., Barsoum, N.,  
541 Decamps, H., Foussadier, R., Girel, J., Guillois, H., Hayes, A., Johansson, M., Lambs, L.,  
542 Pautou, G., Peiry, J.L.P.M., Vautier, F., Winfield, M., 2001. The importance of different scale  
543 processes for the restoration of floodplain woodlands. Regulated Rivers Research &  
544 Management 17, 325-345.  
545
- 546 Imbert, E., Lefèvre, F., 2003. Dispersal and gene flow of *Populus nigra* (Salicaceae) along a  
547 dynamic river system. Journal of Ecology 91, 447-456.  
548
- 549 Jacquemyn, H., Honnay, O., Van Looy, K., Breyne, P., 2006. Spatiotemporal structure of  
550 genetic variation of a spreading plant metapopulation on dynamic riverbanks along the Meuse  
551 River. Heredity 96, 471-478.  
552
- 553 Liesebach, H., Schneck, V., Ewald, E., 2010. Clonal fingerprinting in the genus *Populus* L. by  
554 nuclear microsatellite loci regarding differences between sections, species and hybrids. Tree  
555 Genetics & Genomes 6, 259-269.  
556
- 557 Mansourian, S., Doncheva, N., Valchev, K., Vallauri, D., 2019. Lessons Learnt from 20 Years  
558 of Floodplain Forest Restoration: the Lower Danube Landscape, p. 40. WWF France, Paris.
- 559 Marshall, T.C., Slate, J., Kruuk, L.E.B., Pemberton, J.M., 1998. Statistical confidence for  
560 likelihood-based paternity inference in natural populations. Molecular Ecology 7, 639-655.  
561
- 562 Meyer, M., Zacharias, M., Morgenstern, K., Krabel, D., Liesebach, H., 2018. Variable  
563 genotypes at the cpDNA marker locus trnDT in spontaneous rejuvenation of the species  
564 complex around the European black poplar (*Populus nigra* L.) and its relatives collected in  
565 Germany. Landbauforschung 68, 93-102.  
566

- 567 Oecd, 2000. Consensus document on the biology of *Populus* L. (Poplars), pp 53. Environment  
568 Directorate. Organisation for Economic Co-operation and Development, Paris, France.  
569
- 570 Palmer, M., Allan, J.D., Meyer, J., Bernhardt, E.S., 2007. River restoration in the twenty-first  
571 century: Data and experiential future efforts. *Restoration Ecology* 15, 472-481.  
572
- 573 Pospíšíková, M. Šálková, I. 2006. Population structure and parentage analysis of black  
574 poplar along the Morava River. *Canadian Journal of Forest Research-Revue Canadienne de*  
575 *Recherche Forestiere* 36, 1067-1076.  
576
- 577 Rahman, M.H., Dayanandan, S., Rajora, O.P., 2000. Microsatellite DNA markers in *Populus*  
578 *tremuloides*. *Genome* 43, 293-297.  
579
- 580 Rajora, O.P., 1989. Pollen competition among *Populus deltoides* Marsh., *P. nigra* L. and *P.*  
581 *maximowiczii* Henry in fertilizing *P. deltoides* ovules and siring its seed crop. *Sexual Plant*  
582 *Reproduction* 2, 90-96.  
583
- 584 Schindler, S., O'Neill, F.H., Biró, M., Damm, C., Gasso, V., Kanka, R., van der Sluis, T.,  
585 Krug, A., Lauwaars, S.G., Sebesvari, Z., Pusch, M., Baranovsky, B., Ehlert, T., Neukirchen,  
586 B., Martin, J.R., Euller, K., Mauerhofer, V., Wrbka, T., 2016. Multifunctional floodplain  
587 management and biodiversity effects: a knowledge synthesis for six European countries.  
588 *Biodiversity and Conservation* 25, 1349-1382.  
589
- 590 Smulders, M.J.M., Beringen, R., Volosyanchuk, R., Broeck, A.V., van der Schoot, J., Arens,  
591 P., Vosman, B., 2008a. Natural hybridisation between *Populus nigra* L. and *P. x canadensis*  
592 Moench. hybrid offspring competes for niches along the Rhine river in the Netherlands. *Tree*  
593 *Genetics & Genomes* 4, 663-675.  
594
- 595 Smulders, M.J.M., Cottrell, J.E., Lefevre, F., van der Schoot, J., Arens, P., Vosman, B.,  
596 Tabbener, H.E., Grassi, F., Fossati, T., Castiglione, S., Krystufek, V., Fluch, S., Burg, K.,  
597 Vornam, B., Pohl, A., Gebhardt, K., Alba, N., Agundez, D., Maestro, C., Notivol, E.,  
598 Volosyanchuk, R., Pospiskova, M., Bordacs, S., Bovenschen, J., van Dam, B.C., Koelewijn,  
599 H.P., Halfmaerten, D., Ivens, B., Van Slycken, J., Broeck, A.V., Storme, V., Boerjan, W.,  
600 2008b. Structure of the genetic diversity in black poplar (*Populus nigra* L.) populations across  
601 European river systems: Consequences for conservation and restoration. *Forest Ecology and*  
602 *Management* 255, 1388-1399.  
603
- 604 Smulders, M.J.M., van der Schoot, J., Arens, P., Vosman, B., 2001. Trinucleotide repeat  
605 microsatellite markers for Black poplar (*Populus nigra* L.). *Molecular Ecology Notes* 1, 188-  
606 190.  
607
- 608 Stettler, R.F., Zsuffa, L., Wu, R., 1996. The role of hybridization in the genetic manipulation  
609 of *Populus*, In *Biology of Populus*. eds H.D. Stettler, J.H.E. Bradshaw, P.E. Heilman, T.M.  
610 Hinckley, pp. 87-112. NRC Research Press. National Research Council of Canada, Ottawa,  
611 Canada.  
612
- 613 Storme, V., Vanden Broeck, A., Ivens, B., Smulders, M.J.M., Halfmaerten, D., Van Slycken,  
614 J., Boerjan, W., 2001. Ex-situ conservation of black poplar in Belgium, the margin of the  
615 geographical distribution, In *Genetic diversity in river populations of European black poplar* :  
616 *implications for riparian eco-system management*. Csiszar Nyomda, Budapest.

- 617  
618 Van Braeckel, A., Van Looy, K., 2007. River restoration along the Border Meuse : evaluation  
619 of scenarios for measures and management with an integrated model. *Water: Journal for*  
620 *Integrated Water Management* 30, 87-94.  
621  
622 van der Schoot, J., Pospisková, M., Vosman, B., 2000. Development and characterization of  
623 microsatellite markers in black poplar (*Populus nigra* L.). *Theoretical and Applied Genetics*  
624 101, 317-322.  
625  
626 Van Looy, K., 2006. River Restoration & Biodiversity Conservation. A Disorder Approach.  
627 PhD-thesis. Research Institute for Nature and Forest, Brussels.  
628  
629 Van Looy, K., Honnay, O., Pedrolí, B., Muller, S., 2006. Order and disorder in the river  
630 continuum: the contribution of continuity and connectivity to floodplain meadow biodiversity.  
631 *Journal of Biogeography* 33, 1615-1627.  
632  
633 Van Looy, K., Meire, P., Wasson, J.-G., 2008. Including riparian vegetation in the definition  
634 of morphologic reference conditions for large rivers: a case study for Europe's Western  
635 Plains. *Environmental Management* 41, 625-639.  
636  
637 Van Looy, K., Severyns, J., Jochems, H., Smedt, F., 2005. Predicting patterns of riparian  
638 forest restoration. *Archiv für Hydrobiologie* Vol. 155 / 1-4, 373-390.  
639  
640 Van Looy, K., Tormos, T., Ferreol, M., Villeneuve, B., Valette, L., Chandesris, A., Bougon,  
641 N., Oraison, F., Souchon, Y., 2013. Benefits of riparian forest for the aquatic ecosystem  
642 assessed at a large geographic scale. *Knowledge and Management of Aquatic Ecosystems*  
643 408, 06.  
644  
645 Vanden-Broeck, A., Cox, K., Michiels, B., Verschelde, P., Villar, M., 2012. With a little help  
646 from my friends: hybrid fertility of exotic *Populus x canadensis* enhanced by related native  
647 *Populus nigra*. *Biological Invasions* 14, 1683-1696.  
648  
649 Vanden Broeck, A., 2004. Potential gene flow between native European black poplar  
650 (*Populus nigra* L.) and cultivated poplars in Belgium. PhD-thesis. University Ghent.  
651  
652 Vanden Broeck, A., Cox, K., Quataert, P., Van Bockstaele, E., Van Slycken, J., 2003a.  
653 Flowering phenology of *Populus nigra* L., *P. nigra* cv. *italica* and *P. x canadensis* Moench.  
654 and the potential for natural hybridisation in Belgium. *Silvae genetica* 52, 280-283.  
655  
656 Vanden Broeck, A., Jochems, H.S.V.V.L.K., 2002. Mogelijkheden tot herstel van  
657 levensvatbare populaties Zwarte populier (*Populus nigra* L.) langsheen de Grensmaas,  
658 VLINA 00/10: eindrapport. Research Institute for Nature and Forest, Brussel, 62 pp.  
659  
660 Vanden Broeck, A., Quataert, P., Roldan-Ruiz, I., Van Bockstaele, E., Van Slycken, J.,  
661 2003b. Pollen competition in *Populus nigra* females revealed by microsatellite markers.  
662 *Forest genetics* 10, 219-227.  
663  
664 Vanden Broeck, A., Storme, V., Cottrell, J.E., Boerjan, W., Van Bockstaele, E., Quataert, P.,  
665 Van Slycken, J., 2004. Gene flow between cultivated poplars and native black poplar



- 666 (*Populus nigra* L.): A case study along the river Meuse on the Dutch-Belgian border. Forest  
667 Ecology and Management 197, 307-310.  
668
- 669 Vanden Broeck, A., Villar, M., Van Bockstaele, E., Van Slycken, J., 2005. Natural  
670 hybridization between cultivated poplars and their wild relatives. Annals of Forest Science 62,  
671 601-613.  
672
- 673 Ziegenhagen, B., Gneuss, S., Rathmacher, G., Leyer, I., Bialozyt, R., Heinze, B., Liepelt, S.,  
674 2008. A fast and simple genetic survey reveals the spread of poplar hybrids at a natural Elbe  
675 river site. Conservation Genetics 9, 373-379.  
676
- 677 Zsuffa, L., 1974. The Genetics of *Populus nigra* L. Academia scientiarum et artium slavorum  
678 meridionalium (Zagreb). Annales Forestales 6/2, 29-53.  
679

680 **13. Tables**

681 **Table 1.** The number of seeds collected, seed germination percentage and the number of  
682 seedlings analyzed per open pollinated *Populus nigra* female.

| Collection year | Location  | P. nigra tree ID | # seeds | seed germination (%) | # seedlings analysed |
|-----------------|-----------|------------------|---------|----------------------|----------------------|
| 2018            | Groeskens | 2.16             | NA      | NA                   | 28                   |
| 2018            | Groeskens | 5.20             | NA      | NA                   | 1                    |
| 2019            | Negenoord | 1                | 160     | 2.50                 | 4                    |
| 2019            | Negenoord | 2                | 300     | 3.00                 | 9                    |
| 2019            | Negenoord | 3                | 300     | 5.67                 | 17                   |
| 2019            | Groeskens | 5.25             | 300     | 3.00                 | 8                    |
| 2019            | Groeskens | 5.20             | 76      | 6.58                 | 5                    |
| Total           |           |                  |         |                      | 72                   |

683

684

685 **Table 2** Microsatellite loci used for taxonomic classification and paternity analysis.

|   | Locus     | Linkage group | Repeat motif | Fragment size (bp) | Annealing Temperature (°C) | Reference                    |
|---|-----------|---------------|--------------|--------------------|----------------------------|------------------------------|
| 1 | PMGC_14   | XIII          | CTT          | 179 - 227          | 52                         | PMGC                         |
| 2 | WPMS_05   | XII           | GT           | 263 - 291          | 52                         | van der Schoot et al. (2000) |
| 3 | PMGC_2163 | X             | GA           | 198 - 220          | 52                         | PMGC                         |
| 4 | PMGC_456  | II            | GA           | 80 - 136           | 52                         | PMGC                         |
| 5 | WPMS_16   | VII           | GTC          | 128-167            | 52                         | Smulders et al. (2001)       |
| 6 | WPMS_09   | VI            | GT           | 244 -294           | 57                         | Smulders et al. (2001)       |
| 7 | PTR2      | IX            | TGG          | 207 -228           | 57                         | Dayanandan et al. (1998)     |
| 8 | WPMS_20   | XIII          | TTCTGG       | 224 - 242          | 57                         | Smulders et al. (2001)       |
| 9 | PTR7      | XII           | (CT)5AT(CT)  | 230 -250           | 57                         | Rahman et al. (2002)         |

686

687

688 **14. Figure**

689 **Figure 1. A.** Location of the river Common Meuse. **B.** Map of the study site and sampling  
690 locations. Nearby sampled poplar seedlings are clustered and the total number of clustered  
691 samples is given in the circles. Stars indicate the position of hybrid poplar seedlings sampled.  
692 **C.** Location of the introduced *Populus nigra*.

693

694 **15. Supplementary material**

695 [Table S1](#). List of *Populus* species and poplar cultivars with known taxonomic identity used as  
696 reference samples. References to the cultivars were obtained from the International Register  
697 of Poplar Cultivars (IPC – FAO)

698

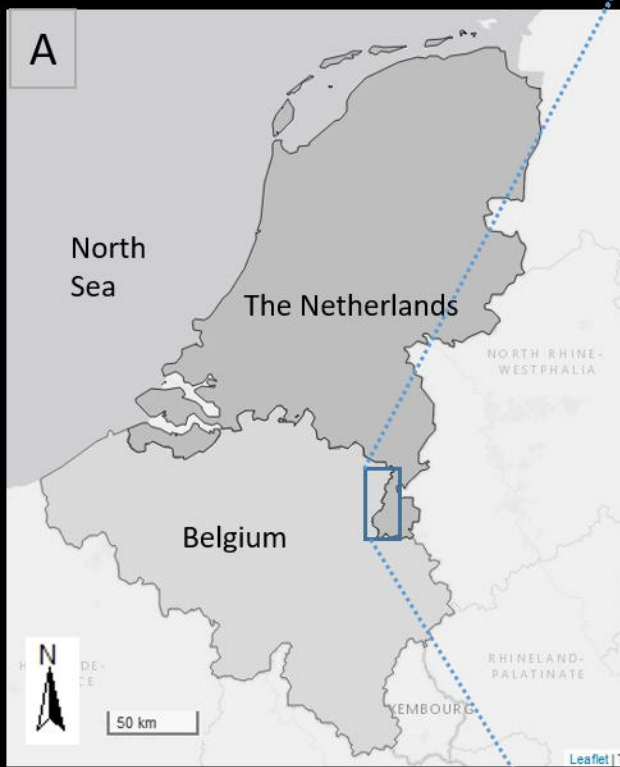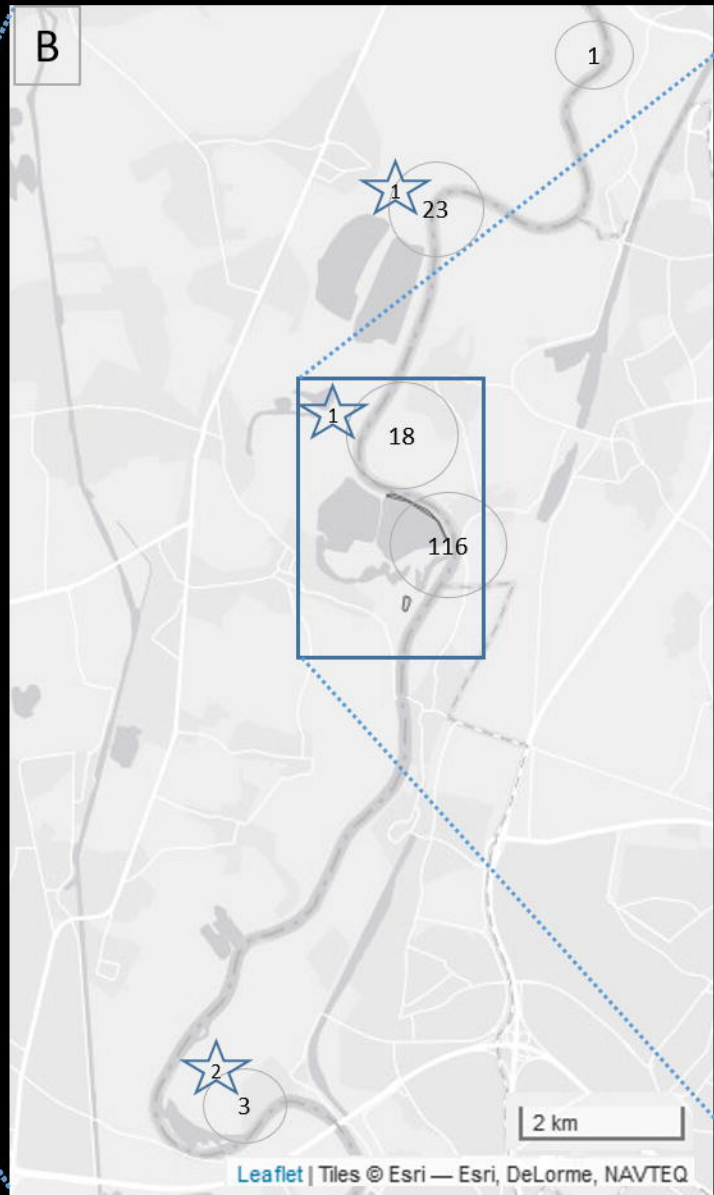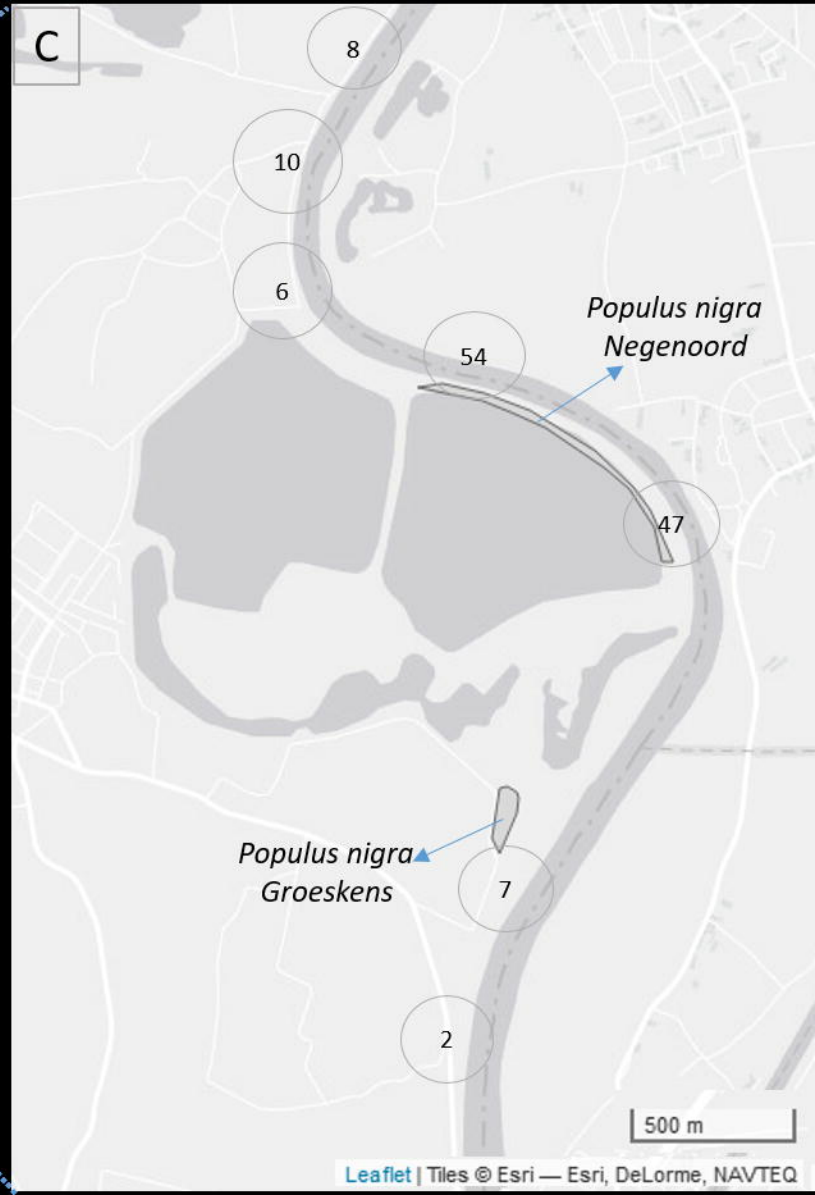

**Legend**

-  Number of poplar seedlings sampled
-  Hybrid poplar seedling sampled
